# Supplementary material
Source: PubMed Central journal article supplement (PMC8009686)
Supplement: NIHMS1684316-supplement-1.pdf [file NIHMS1684316-supplement-1.pdf]

## Appendix

Supplemental Table 1

Sensitivity analysis of pregnancies missing birthweight ( $n = 718$ )

| Characteristic               | With fibroids<br>$n = 62$ (8.6%)* | Without fibroids<br>$n = 656$ (91.4%)* |
|------------------------------|-----------------------------------|----------------------------------------|
| Maternal age, y              |                                   |                                        |
| <25                          | 9 (14.5)                          | 184 (28.1)                             |
| 25–29                        | 20 (32.3)                         | 234 (35.7)                             |
| 30–34                        | 19 (30.7)                         | 171 (26.1)                             |
| ≥35                          | 14 (22.6)                         | 67 (10.2)                              |
| Race or ethnicity            |                                   |                                        |
| White non-Hispanic           | 32 (51.7)                         | 434 (66.3)                             |
| Black non-Hispanic           | 27 (43.6)                         | 156 (23.8)                             |
| Hispanic                     | 1 (1.6)                           | 35 (5.3)                               |
| Other non-Hispanic           | 2 (3.2)                           | 30 (4.6)                               |
| Missing                      | 0                                 | 1                                      |
| Body mass index <sup>†</sup> |                                   |                                        |
| Underweight                  | 2 (3.2)                           | 17 (2.6)                               |
| Normal weight                | 22 (35.5)                         | 335 (51.5)                             |
| Overweight                   | 20 (32.3)                         | 164 (25.2)                             |
| Obese                        | 18 (29.0)                         | 135 (20.7)                             |
| Missing                      | 0                                 | 5                                      |
| Education level              |                                   |                                        |
| High school or less          | 10 (16.1)                         | 151 (23.0)                             |
| Some college                 | 19 (30.7)                         | 123 (18.8)                             |
| College or more              | 33 (53)                           | 382 (58.2)                             |
| Marital status               |                                   |                                        |
| Married                      | 49 (79.0)                         | 575 (87.7)                             |
| Other                        | 13 (21.0)                         | 81 (12.4)                              |
| Household income             |                                   |                                        |
| ≤\$40,000                    | 16 (27.6)                         | 246 (41.8)                             |
| \$40,001–80,000              | 25 (43.1)                         | 212 (36.1)                             |
| ≥\$80,001                    | 17 (29.3)                         | 130 (22.1)                             |
| Missing                      | 4                                 | 68                                     |
| Parity                       |                                   |                                        |
| 0                            | 25 (41.7)                         | 308 (50.7)                             |
| 1                            | 20 (33.3)                         | 188 (31.0)                             |
| ≥2                           | 15 (25.0)                         | 111 (18.3)                             |
| Missing                      | 2                                 | 49                                     |
| Prior preterm birth          |                                   |                                        |
| None                         | 54 (90.0)                         | 544 (89.6)                             |
| Any                          | 6 (10.0)                          | 63 (10.4)                              |
| Missing                      | 2                                 | 49                                     |
| Smoking                      |                                   |                                        |
| Never                        | 43 (69.4)                         | 451 (73.6)                             |
| Current or recent quit       | 6 (9.7)                           | 82 (13.4)                              |
| Distant quit <sup>‡</sup>    | 13 (21.0)                         | 80 (13.1)                              |
| Missing                      | 0                                 | 43                                     |
| Alcohol                      |                                   |                                        |
| Never                        | 6 (9.7)                           | 108 (17.6)                             |
| Current or recent quit       | 33 (53.2)                         | 335 (54.7)                             |
| Distant quit <sup>‡</sup>    | 23 (37.1)                         | 170 (27.7)                             |
| Missing                      | 0                                 | 43                                     |
| Diabetes                     |                                   |                                        |
| None                         | 60 (96.8)                         | 591 (96.4)                             |
| Type I                       | 0 (0.0)                           | 4 (0.7)                                |
| Type II                      | 1 (1.6)                           | 0 (0.0)                                |
| Gestational diabetes         | 1 (1.6)                           | 18 (3.0)                               |
| Missing                      | 0                                 | 43                                     |
| Caffeine consumption         |                                   |                                        |
| None                         | 14 (22.6)                         | 183 (29.9)                             |
| Any                          | 48 (77.4)                         | 430 (70.2)                             |
| Missing                      | 0                                 | 43                                     |
| Prenatal vitamins            |                                   |                                        |
| None                         | 2 (3.2)                           | 22 (3.6)                               |
| Any                          | 60 (96.8)                         | 589 (96.4)                             |
| Missing                      | 0                                 | 45                                     |
| Folic acid                   |                                   |                                        |
| None                         | 2 (3.2)                           | 22 (3.6)                               |
| Any                          | 60 (96.8)                         | 588 (96.4)                             |
| Missing                      | 0                                 | 46                                     |
| Infant sex                   |                                   |                                        |

Supplemental Table 1 (continued)

| Characteristic | With fibroids<br>$n = 62$ (8.6%)* | Without fibroids<br>$n = 656$ (91.4%)* |
|----------------|-----------------------------------|----------------------------------------|
| Male           | 2 (20.0)                          | 60 (52.2)                              |
| Female         | 8 (80.0)                          | 55 (47.8)                              |
| Missing        | 52                                | 541                                    |
| Study site     |                                   |                                        |
| North Carolina | 21 (33.9)                         | 223 (34.0)                             |
| Tennessee      | 41 (66.1)                         | 415 (63.3)                             |
| Texas          | 0 (0.0)                           | 18 (2.7)                               |

\* Data are counts and column percentages for each characteristic. Percentages exclude missing data and may not add up to 100% due to rounding.

<sup>†</sup> Body mass index was calculated as weight (kg)/height (m)<sup>2</sup> and was categorized as underweight: <18.5; normal weight: 18.5–24.9; overweight: 25.0–29.9; or obese: ≥30.

<sup>‡</sup> Distant quit defined as cessation before four months before first trimester interview.

**Supplemental Table 2**  
Fibroid and birth outcomes adjusting for age, BMI, race/ethnicity

| Fibroid characteristic      | Birthweight (grams)                                  |                                                      | Gestational age (d)                                  |                                                      |
|-----------------------------|------------------------------------------------------|------------------------------------------------------|------------------------------------------------------|------------------------------------------------------|
|                             | White non-Hispanic coefficient (95% CI) <sup>*</sup> | Black non-Hispanic coefficient (95% CI) <sup>†</sup> | White non-Hispanic coefficient (95% CI) <sup>*</sup> | Black non-Hispanic coefficient (95% CI) <sup>†</sup> |
| Fibroids present            |                                                      |                                                      |                                                      |                                                      |
| No                          | 0 (Reference)                                        | 0 (Reference)                                        | 0.0 (Reference)                                      | 0.0 (Reference)                                      |
| Yes                         | -16 (-85, 54)                                        | -2 (-130, 126)                                       | 0.4 (-1.2, 1.9)                                      | 1.8 (-1.8, 5.5)                                      |
| Fibroid number <sup>‡</sup> |                                                      |                                                      |                                                      |                                                      |
| 1                           | 15 (-63, 93)                                         | 34 (-119, 188)                                       | 0.7 (-1.0, 2.5)                                      | 3.0 (-1.4, 7.4)                                      |
| 2                           | -40 (-212, 133)                                      | 103 (-159, 364)                                      | -0.3 (-4.2, 3.6)                                     | 3.0 (-4.5, 10.6)                                     |
| ≥3                          | -254 (-481, -27)                                     | -191 (-426, 44)                                      | -1.8 (-6.9, 3.3)                                     | -2.4 (-9.2, 4.4)                                     |
| Fibroid type <sup>§</sup>   |                                                      |                                                      |                                                      |                                                      |
| Any subserosal              | 22.3 (-81, 126)                                      | -85 (-265, 96)                                       | 1.2 (-1.1, 3.5)                                      | -0.5 (-5.7, 4.7)                                     |
| Any intramural              | -114 (-216, -12)                                     | 49 (-127, 224)                                       | -0.4 (-2.7, 1.9)                                     | 3.0 (-2.0, 8.1)                                      |
| Any submucosal              | 64 (-103, 230)                                       | -25 (-231, 182)                                      | -1.2 (-5.0, 2.5)                                     | 3.4 (-2.5, 9.3)                                      |
| Total volume <sup>  </sup>  |                                                      |                                                      |                                                      |                                                      |
| Lowest quartile             | -1 (-122, 121)                                       | 245 (-46, 536)                                       | 0.1 (-2.7, 2.8)                                      | 8.5 (0.2, 16.9)                                      |
| 2nd quartile                | -40 (-172, 92)                                       | -135 (-370, 99)                                      | 2.7 (-0.2, 5.7)                                      | -1.5 (-8.2, 5.3)                                     |
| 3rd quartile                | 37 (-93, 167)                                        | -24 (-244, 195)                                      | -0.1 (-3.0, 2.9)                                     | 0.5 (-5.8, 6.8)                                      |
| Top quartile                | -86 (-244, 72)                                       | -2 (-192, 188)                                       | -2.0 (-5.5, 1.6)                                     | 2.2 (-3.2, 7.7)                                      |

BMI = body mass index; CI = confidence interval.

<sup>\*</sup> Among 2853 white non-Hispanics, 32 missing confounder data were excluded.

<sup>†</sup> Among 628 white non-Hispanics, 18 missing confounder data were excluded.

<sup>‡</sup> Only available for women with fibroids.

<sup>§</sup> Type is mutually exclusive for each fibroid, but a woman with multiple fibroids can have more than one type of fibroid.

<sup>||</sup> Quartiles for total fibroid volume (cm<sup>3</sup>): <0.92, 0.92–4.54, 4.55–19.47, >19.47.

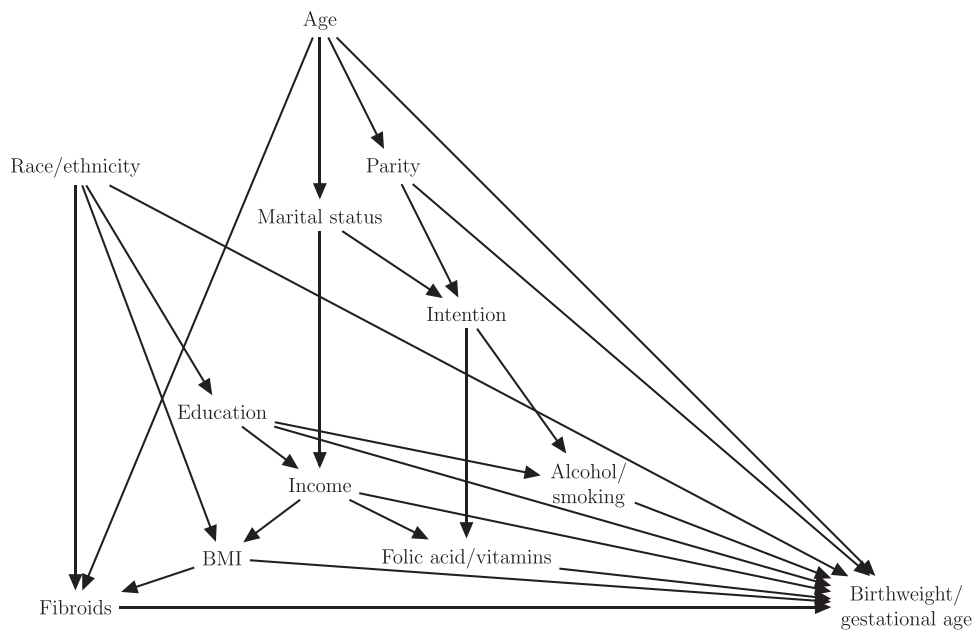

**Supplemental Figure 1.** Directed acyclic graph representing the relationship among covariates with fibroids and birth outcomes.
